# Supplementary material for: Reducing barriers to consulting a General Practitioner in patients at increased risk of lung cancer: a qualitative evaluation of the CHEST Australia intervention
Source: Oxford University Press journal article supplement (doi:10.1093/fampra/cmx057), 2017-06-02
Supplement: cmx057_suppl_supplementary_material.pdf [file cmx057_suppl_supplementary_material.pdf]

## **Topic guide for participant interviews.**

### **Introduction**

“Before we begin this interview I want to make sure that you understand your rights in relation to this interview:

- Have you signed a consent form?
- Do you understand you can stop this interview at any stage?
- Do I have permission to make a confidential recording of this interview?
- Can I use your first name when I talk to you?

In this interview we would like to ask you for your thoughts and opinions on our study on “It’s as easy as 123.” For example what you liked about it, and what you think we could do differently to improve it. We hope to use this resource in a GP practice in the long term- so getting your opinions would be very valuable.”

### **Main interview discussion**

#### **1. “What did you think when you received the invitation to the study?”**

- Concerns about getting a lung condition?
- Concern’s about asbestos exposure?
- Concerns about family history of lung disease.
- Want to contribute to research?
- Free lung function test?

#### **2. Experience of the consultation.**

“How did you find the consultation you had?”

- What did you like about it? Eg. Worries about lung health, concerns about lung health could be more openly discussed in this environment. Spirometry test: prompt: what did you think about having a lung function test.
- Was there anything you did not like about the consultation?

#### **3. Explore thoughts and opinions on the self-help manual and reminders.**

“Do you remember we gave you the self-help manual?”

- What did you think about the booklet?
- Useful, not useful?
- How did you use the booklet?
- Did you use it on your own or with someone else?
- Were the monthly reminders useful?

#### **4. Symptom Recognition.**

“Because this is a lung study, we want to know more about your visits to your GP with chest symptoms”

#### **5. “Have you visited your GP lately with any respiratory symptoms after taking part in the study? “**

If Yes: -Could you describe your symptom/s. (duration).

How long did you wait before visiting your GP?

What made you go and visit your GP about your symptoms? (Could lead into how you feel when the GP talks to you about smoking cessation here)

**6. What do you remember about the signs of lung disease?**

What are the main things you took away from the consultation/self-help manual?

**7. Unpacking Confidence**

“Do you think the self-help booklet/consultation made a difference in whether you may see your GP in the future? “

Prompt: How confident do you feel about seeing your GP with lung symptoms?

If no: what might keep you from visiting your GP?

**8. “Is there anything more you would like to add”**

**Closing**

“Thank you very much for your time today. Your thoughts and opinions are really important to us and help us evaluate whether this resource is going to be useful in the long term in General Practice”
